# Supplementary material
Source: HighWire-hosted journal article supplement (http://www.ajnr.org/highwire/filestream/74656/field_highwire_adjunct_files/0/19-01351.pdf)
Supplement: 19-01351.pdf [file 19-01351.pdf]

**On-line Table 1: MR imaging acquisition parameters (3T scanner)<sup>a</sup>**

|                     | Sag 3D T1WI     | Sag 3D T2WI     | Ax T2WI TSE       | Synthetic MR Imaging | 3D SWI          | DWI             | Multishell DTI  |
|---------------------|-----------------|-----------------|-------------------|----------------------|-----------------|-----------------|-----------------|
| FOV (mm)            | 175 × 175 × 110 | 160 × 160 × 180 | 167 × 167 × 115   | 181 × 150 × 105      | 150 × 124 × 100 | 180 × 180 × 139 | 200 × 200 × 100 |
| Voxel size (mm)     | 1.0 × 1.0 × 1.0 | 0.9 × 0.9 × 0.9 | 0.55 × 0.75 × 3.0 | 0.7 × 0.9 × 3.0      | 0.6 × 0.6 × 2.0 | 1.5 × 1.9 × 4   | 2.0 × 2.0 × 2.0 |
| Section gap (mm)    | —               | —               | 0.3               | 0.3                  | —               | 1               | 0               |
| TR (ms)             | 6.1             | 2500            | 5934              | 5000                 | 31              | 3870            | 6766            |
| TE (ms)             | 2.7             | 331             | 120               | 13/100               | 7.2             | 103             | 106             |
| TI (ms)             | 800             | —               | —                 | 4 TIs, default       | —               | —               | 220             |
| ETL (ms)            | 141             | 117             | 21                | 10                   | —               | —               | —               |
| SENSE factor        | 1               | 2/2.5           | 1.6               | 1.7                  | 2/1             | 2               | 2.2             |
| Bandwidth (kHz)     | 298             | 457             | 149.8             | 220.5                | 254             | 1436            | 1913            |
| Averages            | 1               | 1               | 2                 | 1                    | 1               | 1               | 1               |
| Flip angle          | 8°              | 90°             | 90°               | 90°                  | 17°             | 90°             | 90°             |
| Scan time (min:sec) | 3:37            | 2:00            | 2:34              | 6:10                 | 2:42            | 0:46            | 16:34           |

**Note:**—ETL indicates echo-train length; SENSE, sensitivity encoding; —, no gap; Ax, axial; Sag, sagittal.

<sup>a</sup> Axial T2WI TSE was performed between February 2017 and December 2018 (n = 76). Sagittal 3D T2WI was performed between July 2017 and June 2019 (n = 91). Fifty-nine neonates had both 2D and 3D T2-weighted scans.

**On-line Table 2: Synthetic image reconstruction parameters**

|         | TIWI | TI PSIR | T2WI   | T2 STIR |
|---------|------|---------|--------|---------|
| TE (ms) | 5    | 10      | 200    | 100     |
| TR (ms) | 100  | 6000    | 15,000 | 15,000  |
| TI (ms) | —    | 500     | —      | 300     |

**Note:**— indicates none or not applicable; PSIR, phase-sensitive inversion recovery.
